# Supplementary material for: Land Subsidence Susceptibility Mapping Using Interferometric Synthetic Aperture Radar (InSAR) and Machine Learning Models in a Semiarid Region of Iran
Source: MDPI journal article supplement (doi:10.3390/land12040843), 2023-04-07
Supplement: s1 [file s1]

**Table S1.** Descriptions of the lithology of the Bakhtegan basin (Hasan Shahi & Dastoor, 1995)

| Unit    | Description                                                                      | Age                   |
|---------|----------------------------------------------------------------------------------|-----------------------|
| Qft2    | Low-level piedmont fan and valley terrace deposits                               | Quaternary            |
| Kbgp    | Undivided Bangestan Group, mainly limestone and shale                            | Cretaceous            |
| Kda-fa  | Grey to brown, partly oolitic, massive limestone;                                | Cretaceous            |
| JKkpg   | Undivided Khami Group, consisting of massive thin-bedded limestone               | Jurassic Cretaceous   |
| Eja     | Grey and brown weathered, massive dolomite                                       | Eocene                |
| Plbk    | Forming conglomerate and low -weathering cross-bedded sandstone                  | Pliocene              |
| TRJs    | Dark grey shale and sandstone                                                    | Jurassic              |
| Kgu     | Bluish grey marl and shale with subordinate thin-bedded argillaceous - limestone | Cretaceous            |
| Ktb     | Massive, shelly, cliff-forming, partly anhydrite limestone                       | Late.Cretaceous       |
| Qft1    | High-level piedmont fan and valley terrace deposits                              | Quaternary            |
| gb      | Layered and isotropic gabbro                                                     | Jurassic-Cretaceous   |
| Ek      | Well-bedded green tuff and tuffaceous shale                                      | Eocene                |
| pC-Ch   | Rock salt, gypsum & blocks of contorted masses of sedimentary material           | Precambrian-Cambrian  |
| Lake    | Lake                                                                             | Late.Eocene-Oligocene |
| TRKurl  | Purple and red thin                                                              | Triassic-Cretaceous   |
| MPlfgp  | Reefal coral and algal limestone                                                 | Miocene               |
| PeEsa   | Pale red marl, marlstone, limestone, gypsum, and dolomite                        | Paleocene-Eocene      |
| Ksv     | Grey, thick-bedded to massive limestone with thin marl                           | Late.Cretaceous       |
| Qcf     | Clay flat                                                                        | Quaternary            |
| pd      | Peridotite including harzburgite, dunite, lertzolite and websterite              | Triassic-Cretaceous   |
| KEpd-gu | Grey and brown, medium - bedded to massive fossiliferous limestone               | Late.Cretaceous       |

## References

Hasan Shahi H, Dastoor F. 1995. Reconnaissance soil survey of Neyriz Plain. Tehran (Iran): Soil and Water Research Institute (Ministry of Agriculture Jihad).
